# Supplementary material
Source: PubMed Central journal article supplement (PMC3102249)

SUPPORTING INFORMATION

**Table 1S. List of primers used for site-directed mutagenesis.**

| <b>Primer Name</b> | <b>Sequence (5' → 3')</b>                               |
|--------------------|---------------------------------------------------------|
| C79S<br>Forward    | CCGTGGTCGTGCTGTCTGGGACGG                                |
| C79S<br>Reverse    | CCGTCCCAGACAGCACGACCACGG                                |
| C152S<br>Forward   | GAGGAGGCCCGGTCTCTGGTGGAGG                               |
| C152S<br>Reverse   | CCTCCACCAGAGACCGGGCCTCCTC                               |
| E60C<br>Forward    | TCCTTCCTGCGGCTCCGATGTAAATACGGGGACGTGTTC                 |
| E60C<br>Reverse    | GAACACGTCCCCGTATTTACATCGGAGCCGCAGGAAGGA                 |
| H226C<br>Forward   | CCCGGGCTTCCTAAAGTGCTTTCCTGGCACGCAC                      |
| H226C<br>Reverse   | GTGCGTGCCAGGAAAGCACTTTAGGAAGCCCGGG                      |
| Y484C<br>Forward   | CGTGCCCCCGAGCTGCCAGATCCGCTTC                            |
| Y484C<br>Reverse   | GAAGCGGATCTGGCAGCTCGGGGGCACG                            |
| V267C<br>Forward   | CTAGGGATTTTCATCGACTGCTACCTGCTCCGCATGG                   |
| V267C<br>Reverse   | CCATGCGGAGCAGGTAGCAGTCGATGAAATCCCTAG                    |
| R133C<br>Forward   | CGGAGATTCTCCCTGGCCACCATGTGCGACTTCGGCATGGGGAAGCGGAGC     |
| R133C<br>Reverse   | GCTCCGCTTCCCATGCCGAAGTCGCACATGGTGGCCAGGGAGAATCTCCG      |
| L270C<br>Forward   | AGGGATTTTCATCGACGTCTACCTGTGCCGCATGGAAAAAGACAAGTCCGA     |
| L270C<br>Reverse   | TCGGACTTGTCTTTTTCCATGCGGCACAGGTAGACGTCGATGAAATCCCT      |
| L420C<br>Forward   | GCCACTTTCTAGATGCCAACGGGGCATGCAAGAGGAATGAAGGCTTTATGCCCTT |
| L420C<br>Reverse   | AAGGGCATAAAGCCTTCATTCCTCTTGCATGCCCCGTTGGCATCTAGAAAGTGGC |

**Table 2S. CYP2B4 proximal residues, identified by Bridges et al. and this study, to be involved in CPR binding and their corresponding residues in P450BM3.**

| <b>CYP2B4</b> | <b>P450BM3</b> |
|---------------|----------------|
| R443          | L408           |
| R422          | -              |
| R133          | V121           |
| K433          | Q398           |
| K139          | L127           |
| R126          | N102           |
| R122          | K98            |
| M137          | V125           |
| F135          | I123           |
| V267          | H237           |
| L270          | L239           |

“-” = no equivalent residue identified in P450BM3

**Figure 1S. Kinetics for the reduction of the CYP2B4 V267C and L270C proximal variants under saturating and subsaturating amounts of CPR in the presence of NADPH and BNZ.**

CYP2B4, CPR and DLPC were reconstituted for 1 hr on ice and mixed with NADPH in a stopped-flow apparatus. After mixing, the final concentration of CYP2B4 was 0.75  $\mu\text{M}$ , NADPH was 50  $\mu\text{M}$  while BNZ was 1mM. Experiments were conducted as described under “Experimental Procedures” with a saturated solution of CO in both syringes. For convenience, all the absorbance data are offset to the same baseline.

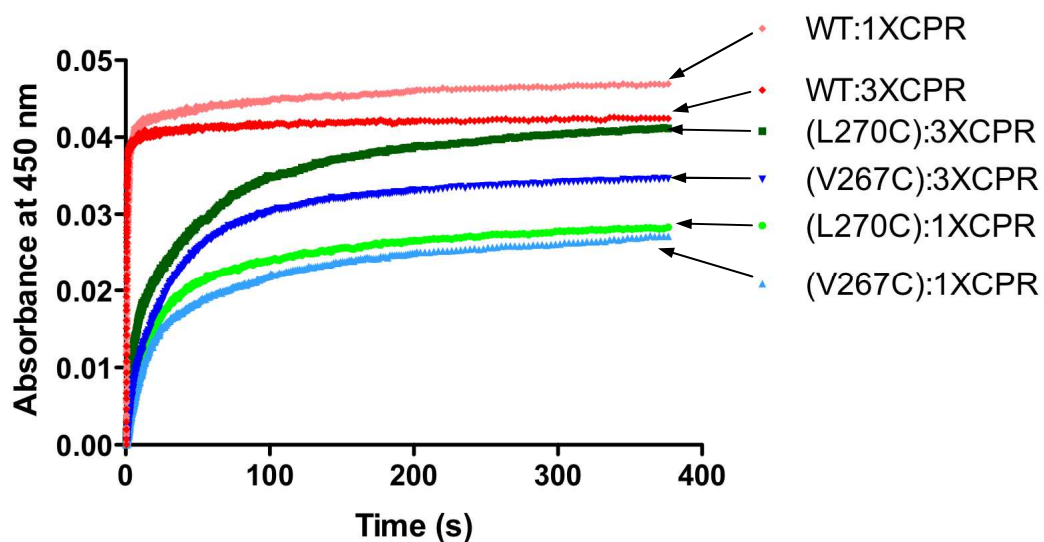

Supplement: NIHMS291051-supplement-1_si_001.pdf [file NIHMS291051-supplement-1_si_001.pdf]
